# Supplementary material for: Facile fabrication of a nanoporous silicon electrode with superior stability for lithium ion batteries
Source: Royal Society of Chemistry journal article supplement (doi:10.1039/c0ee00428f), 2011-01-01

**Supporting Information for:**

**Facile fabrication of a nanoporous silicon electrode with superior stability for lithium  
ion batteries**

*Chunyu Du<sup>a\*</sup>, Cuihua Gao<sup>a</sup>, Geping Yin<sup>a</sup>, Meng Chen<sup>b</sup>, Long Wang<sup>b</sup>*

<sup>a</sup> School of Chemical Engineering and Technology, Harbin Institute of Technology, Harbin 150001,  
China

<sup>b</sup> School of Chemistry and Materials Science, Harbin Engineering University, Harbin 150080, China

**Figure S1.** Thermalgravimetric analysis (TGA) and differential thermal gravimetry (DTG) plots of triethanolamine ( $10\text{ }^{\circ}\text{C min}^{-1}$ ,  $100\text{ mL min}^{-1}$ , Ar atmosphere).

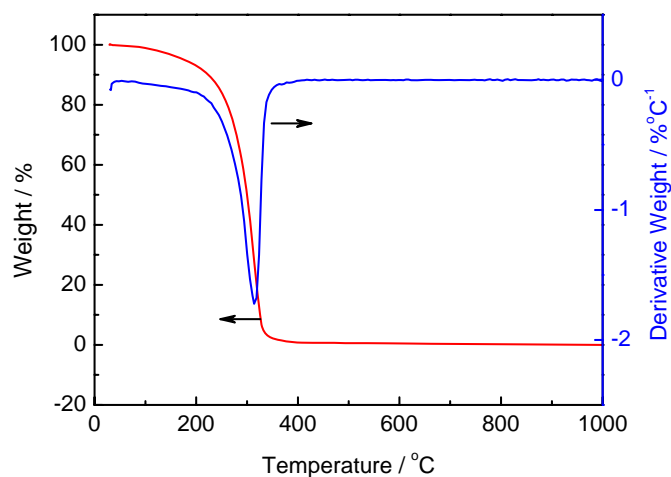

**Figure S2.** Experimental O1s XPS spectrum of the nano-Si powders. The best fit result is also given.

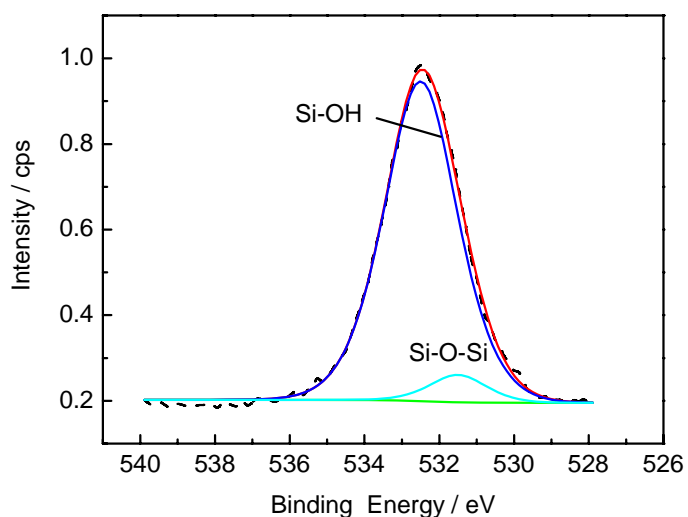

**Figure S3.** SEM image (A) and elemental map of N (B) for the precursor electrode (before heat treatment), and SEM image (C) and elemental map of N (D) for the nanoporous Si electrode (after heat treatment). Scale bar: 5  $\mu\text{m}$ .

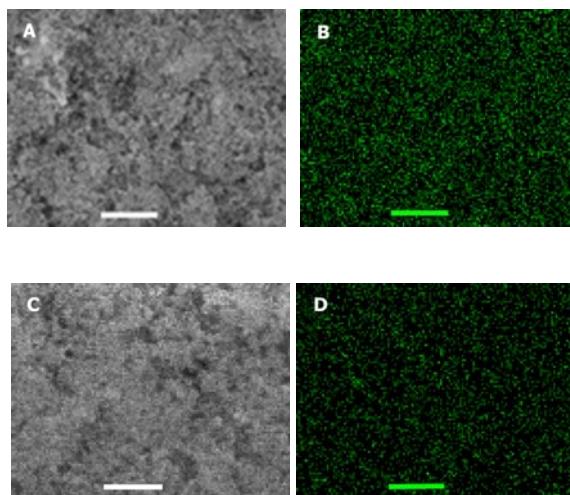

**Figure S4.** EDX spectrum of the nanoporous Si electrode.

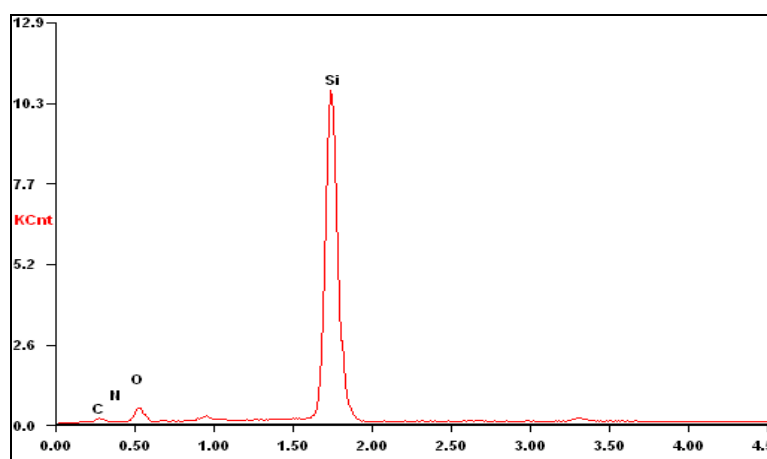

**Figure S5.** The discharge capacity and Coulombic efficiency profiles of the conductive carbon black, TEA residues and CMC binder between 1.5 and 0.02 V

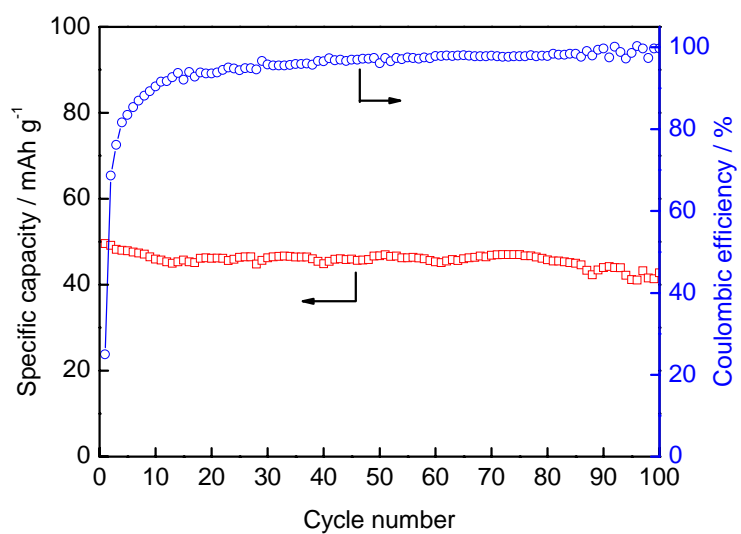

Supplement: c0ee00428f.pdf [file c0ee00428f.pdf]
